# Supplementary material for: Racemic cobalt phosphonates incorporating flexible bis(imidazole) co-ligands
Source: Royal Society of Chemistry journal article supplement (doi:10.1039/c5dt03046c), 2015-01-01
Supplement: c5dt03046c1.pdf [file c5dt03046c1.pdf]

## Supporting information

### Racemic cobalt phosphonates incorporating flexible bis(imidazole) co-ligands

Jian-Shen Feng,<sup>a,b</sup> Zhong-Sheng Cai,<sup>a</sup> Min Ren,<sup>a</sup> Song-Song Bao,<sup>a,\*</sup> and Li-Min Zheng<sup>a,\*</sup>

**Table S1.** Selected bond lengths (Å) and angles (°) for compound **1**.

|             |            |              |            |
|-------------|------------|--------------|------------|
| Co1-O1A     | 2.086(4)   | Co1-O1W      | 2.194(4)   |
| Co1-O4      | 2.088(4)   | Co2-O2       | 2.088(4)   |
| Co1-O3      | 2.098(4)   | Co2-N2       | 2.123(5)   |
| Co1-N5B     | 2.101(5)   | Co2-O2W      | 2.157(4)   |
| Co1-N1      | 2.162(5)   |              |            |
| O1A-Co1-O4  | 91.74(18)  | O3-Co1-O1W   | 86.85(17)  |
| O1A-Co1-O3  | 99.00(16)  | N5B-Co1-O1W  | 87.4(2)    |
| O4-Co1-O3   | 166.11(17) | N1-Co1-O1W   | 95.84(18)  |
| O1A-Co1-N5B | 89.86(19)  | O2-Co2-O2C   | 180.000(1) |
| O4-Co1-N5B  | 90.20(19)  | O2-Co2-N2    | 91.72(19)  |
| O3-Co1-N5B  | 98.56(19)  | O2-Co2-N2C   | 88.28(18)  |
| O1A-Co1-N1  | 86.71(18)  | N2-Co2-N2C   | 180.000(1) |
| O4-Co1-N1   | 88.11(17)  | O2-Co2-O2WC  | 88.12(16)  |
| O3-Co1-N1   | 83.77(17)  | N2-Co2-O2WC  | 87.6(2)    |
| N5B-Co1-N1  | 176.1(2)   | O2-Co2-O2W   | 91.88(16)  |
| O1A-Co1-O1W | 173.86(17) | N2-Co2-O2W   | 92.37(19)  |
| O4-Co1-O1W  | 82.78(18)  | O2WC-Co2-O2W | 180.00(13) |

Symmetry codes: A: -x,-y+1,-z+1; B: -x+1,-y+1,-z+1; C: -x,-y+1,-z+2.

**Table S2** Selected bond lengths (Å) and angles (°) for **2**.

|             |            |             |            |
|-------------|------------|-------------|------------|
| Co1-O4      | 2.091(3)   | Co2-N6B     | 2.124(3)   |
| Co1-O6      | 2.092(2)   | Co2-O2W     | 2.179(2)   |
| Co1-N3A     | 2.098(3)   | Co2-N2      | 2.181(3)   |
| Co1-O3      | 2.104(2)   | Co3-O2      | 2.062(2)   |
| Co1-N1      | 2.138(3)   | Co3-O8C     | 2.093(2)   |
| Co1-O1W     | 2.191(2)   | Co3-N5      | 2.132(3)   |
| Co2-O1      | 2.078(2)   | Co3-N4      | 2.150(3)   |
| Co2-O9      | 2.078(3)   | Co3-O3W     | 2.168(2)   |
| Co2-O7      | 2.114(2)   | Co3-O4W     | 2.181(3)   |
| O4-Co1-O6   | 89.97(10)  | O7-Co2-O2W  | 88.29(9)   |
| O4-Co1-N3A  | 90.90(11)  | N6B-Co2-O2W | 86.45(11)  |
| O6-Co1-N3A  | 91.58(10)  | O1-Co2-N2   | 91.59(10)  |
| O4-Co1-O3   | 168.99(9)  | O9-Co2-N2   | 89.73(10)  |
| O6-Co1-O3   | 98.36(9)   | O7-Co2-N2   | 83.19(10)  |
| N3A-Co1-O3  | 96.03(11)  | N6B-Co2-N2  | 176.92(11) |
| O4-Co1-N1   | 88.85(10)  | O2W-Co2-N2  | 93.01(10)  |
| O6-Co1-N1   | 88.35(10)  | O2-Co3-O8C  | 177.77(10) |
| N3A-Co1-N1  | 179.74(13) | O2-Co3-N5   | 90.71(11)  |
| O3-Co1-N1   | 84.23(10)  | O8C-Co3-N5  | 90.47(10)  |
| O4-Co1-O1W  | 83.67(10)  | O2-Co3-N4   | 91.91(11)  |
| O6-Co1-O1W  | 172.81(9)  | O8C-Co3-N4  | 87.02(11)  |
| N3A-Co1-O1W | 85.19(11)  | N5-Co3-N4   | 175.56(12) |
| O3-Co1-O1W  | 88.38(9)   | O2-Co3-O3W  | 90.10(9)   |
| N1-Co1-O1W  | 94.86(10)  | O8C-Co3-O3W | 91.84(9)   |
| O1-Co2-O9   | 88.54(10)  | N5-Co3-O3W  | 87.05(11)  |
| O1-Co2-O7   | 97.22(9)   | N4-Co3-O3W  | 89.37(11)  |
| O9-Co2-O7   | 170.97(9)  | O2-Co3-O4W  | 91.18(9)   |
| O1-Co2-N6B  | 89.21(11)  | O8C-Co3-O4W | 86.83(9)   |
| O9-Co2-N6B  | 93.27(11)  | N5-Co3-O4W  | 95.28(11)  |
| O7-Co2-N6B  | 93.76(11)  | N4-Co3-O4W  | 88.25(12)  |
| O1-Co2-O2W  | 173.21(9)  | O3W-Co3-O4W | 177.33(10) |
| O9-Co2-O2W  | 86.49(10)  |             |            |

Symmetry codes: A: x+1, y, z-1; B: x-1, y, z; C: x, y, z+1; D: x-1, y, z+1; E: x+1, y, z;  
F: x, y, z-1.

**Table S3** Selected bond lengths (Å) and angles (°) for **3**.

|             |            |              |            |
|-------------|------------|--------------|------------|
| Co1-O1A     | 2.072(2)   | Co1-O1W      | 2.221(2)   |
| Co1-O4      | 2.092(2)   | Co2-N4       | 2.109(3)   |
| Co1-N2B     | 2.109(3)   | Co2-O2       | 2.130(2)   |
| Co1-O3      | 2.124(2)   | Co2-O2W      | 2.140(2)   |
| Co1-N1      | 2.153(3)   |              |            |
| O1A-Co1-O4  | 90.60(9)   | N2B-Co1-O1W  | 89.65(10)  |
| O1A-Co1-N2B | 90.62(10)  | O3-Co1-O1W   | 88.25(9)   |
| O4-Co1-N2B  | 89.61(10)  | N1-Co1-O1W   | 89.11(9)   |
| O1A-Co1-O3  | 97.46(9)   | N4-Co2-N4C   | 180        |
| O4-Co1-O3   | 169.93(9)  | N4-Co2-O2C   | 88.57(9)   |
| N2B-Co1-O3  | 96.30(10)  | N4-Co2-O2    | 91.43(9)   |
| O1A-Co1-N1  | 90.66(9)   | O2C-Co2-O2   | 180        |
| O4-Co1-N1   | 90.54(9)   | N4-Co2-O2WC  | 93.35(10)  |
| N2B-Co1-N1  | 178.72(11) | O2-Co2-O2WC  | 90.09(8)   |
| O3-Co1-N1   | 83.37(9)   | N4-Co2-O2W   | 86.65(10)  |
| O1A-Co1-O1W | 174.22(9)  | O2-Co2-O2W   | 89.91(8)   |
| O4-Co1-O1W  | 83.63(9)   | O2WC-Co2-O2W | 180.000(1) |

Symmetry codes: A:  $-x+2, -y+1, -z+1$ ; B:  $x+1, y-1, z$ ; C:  $-x+2, -y+2, -z+1$ ; D:  $x-1, y+1, z$ .

**Table S4.** Selected bond lengths (Å) and angles (°) for **4**.

|            |           |            |            |
|------------|-----------|------------|------------|
| Co1-O3A    | 1.954(5)  | Co1-N1     | 2.254(7)   |
| Co1-O1     | 1.988(4)  | Co2-O2     | 1.933(4)   |
| Co1-O4     | 2.014(5)  | Co2-N4     | 2.017(5)   |
| Co1-N2     | 2.081(5)  |            |            |
| O3A-Co1-O1 | 108.5(2)  | O1-Co1-N1  | 82.4(2)    |
| O3A-Co1-O4 | 124.7(3)  | O4-Co1-N1  | 78.4(3)    |
| O1-Co1-O4  | 124.9(3)  | N2-Co1-N1  | 164.4(2)   |
| O3A-Co1-N2 | 99.0(2)   | O2-Co2-O2B | 103.0(2)   |
| O1-Co1-N2  | 91.85(19) | O2-Co2-N4  | 113.85(18) |
| O4-Co1-N2  | 93.2(2)   | O2-Co2-N4B | 110.85(18) |
| O3A-Co1-N1 | 96.7(2)   | N4-Co2-N4B | 104.7(3)   |

Symmetry codes: A:  $-x+2, -y, -z$ ; B:  $-x+2, y, -z+1/2$ .

**Table S5.** Hydrogen bonding parameters for **1**.

| D-H...A                | d(D-H) (Å) | d(H...A) (Å) | d(D...A)(Å) | <(D-H...A) (°) |
|------------------------|------------|--------------|-------------|----------------|
| C(1)-H(1B)...O(5)#4    | 0.97       | 2.65         | 3.503(8)    | 146.2          |
| C(2)-H(2)...O(5)#4     | 0.98       | 2.44         | 3.352(8)    | 154.7          |
| C(23)-H(23)...O(3W)#2  | 0.93       | 2.44         | 3.334(13)   | 161.8          |
| N(1)-H(1)...O(3)#1     | 0.98       | 2.13         | 3.056(7)    | 156.7          |
| O(1W)-H(1WA)...O(5)#4  | 0.85       | 1.91         | 2.753(7)    | 172.1          |
| O(1W)-H(1WB)...O(4W)   | 0.85       | 2.08         | 2.896(8)    | 161.9          |
| O(2W)-H(2WA)...O(1)    | 0.85       | 1.83         | 2.644(6)    | 158.9          |
| O(2W)-H(2WB)...O(5)#1  | 0.85       | 2.13         | 2.960(7)    | 164.4          |
| O(3W)-H(3WA)...O(3)    | 0.85       | 2.03         | 2.870(8)    | 168            |
| O(3W)-H(3WB)...O(4W)   | 0.85       | 2.27         | 2.982(10)   | 140.8          |
| O(4W)-H(4WA)...O(4)#4  | 0.85       | 2.49         | 2.989(7)    | 118.5          |
| O(4W)-H(4WB)...O(2)    | 0.85       | 2.13         | 2.767(7)    | 131.6          |
| O(4W)-H(4WB)...O(2W)#3 | 0.85       | 2.46         | 3.211(7)    | 147.5          |

Symmetry codes: #1: -x, -y+1, -z+1; #2: -x+1, -y+1, -z+1; #3: -x, -y+1, -z+2; #4: x, -y+3/2, z+1/2.

**Table S6.** Hydrogen bonding parameters for **2**.

| D-H...A                | d(D-H) (Å) | d(H...A) (Å) | d(D...A)(Å) | <(D-H...A) (°) |
|------------------------|------------|--------------|-------------|----------------|
| C(12)-H(12A)...O(10)#7 | 0.98       | 2.48         | 3.448(4)    | 170            |
| C(2)-H(2A)...O(5)#9    | 0.98       | 2.47         | 3.379(5)    | 154.8          |
| C(35)-H(35A)...O(10)   | 0.93       | 2.38         | 3.255(5)    | 157.8          |
| C(36)-H(36A)...O(3W)   | 0.93       | 2.6          | 3.065(5)    | 111.7          |
| N(1)-H(1C)...O(7)      | 0.91       | 2.29         | 3.138(4)    | 155.3          |
| N(2)-H(2B)...O(3)      | 0.91       | 2.25         | 3.089(4)    | 152.6          |
| O(1W)-H(1WA)...O(5)#9  | 0.85       | 2.11         | 2.775(4)    | 134.6          |
| O(1W)-H(1WB)...O(5W)   | 0.85       | 2.05         | 2.788(4)    | 144.6          |
| O(2W)-H(2WA)...O(10)#7 | 0.85       | 2.06         | 2.728(4)    | 135.3          |
| O(2W)-H(2WB)...O(7W)   | 0.85       | 2.28         | 2.789(4)    | 118.5          |
| O(3W)-H(3WA)...O(6)#3  | 0.85       | 2.03         | 2.668(3)    | 131.2          |
| O(3W)-H(3WB)...O(5)#3  | 0.85       | 2.12         | 2.966(4)    | 176.1          |
| O(4W)-H(4WA)...O(10)   | 0.85       | 2.59         | 3.385(4)    | 156.3          |
| O(4W)-H(4WB)...O(1)    | 0.85       | 2.21         | 2.674(3)    | 114.3          |
| O(5W)-H(5WA)...O(2)    | 0.85       | 2.07         | 2.839(4)    | 150.7          |
| O(5W)-H(5WB)...O(4)#9  | 0.85       | 2.54         | 3.023(4)    | 117.1          |
| O(6W)-H(6WA)...O(3)    | 0.85       | 2.03         | 2.868(4)    | 170.7          |
| O(7W)-H(7WA)...O(8)    | 0.85       | 2            | 2.776(4)    | 150.4          |
| O(7W)-H(7WB)...O(8W)#8 | 0.85       | 2.42         | 2.831(5)    | 110.7          |
| O(8W)-H(8WA)...O(10)#7 | 0.85       | 2.06         | 2.688(4)    | 130.2          |
| O(9W)-H(9WA)...N(6)#2  | 0.85       | 2.59         | 3.417(5)    | 164.9          |

Symmetry codes: #1: x+1, y, z-1; #2: x-1, y, z; #3: x, y, z+1; #4: x-1, y, z+1; #5: x+1, y, z; #6: x, y, z-1; #7: -x+1, -y+1, -z+1; #8: -x+1, -y+1, -z; #9: x, -y+3/2, z+1/2.

**Table S7.** Hydrogen bonding parameters for **3**.

| D-H...A                | d(D-H) (Å) | d(H...A) (Å) | d(D...A)(Å) | <(D-H...A) (°) |
|------------------------|------------|--------------|-------------|----------------|
| C(1)-H(1B)...O(1W)     | 0.97       | 2.61         | 3.121(4)    | 113.3          |
| N(1)-H(1)...O(1)#1     | 0.98       | 2.74         | 3.005(3)    | 96.1           |
| N(1)-H(1)...O(3)#1     | 0.98       | 2.25         | 3.160(3)    | 154.2          |
| O(1W)-H(1WA)...O(5)#10 | 0.85       | 1.97         | 2.788(3)    | 161.8          |
| O(1W)-H(1WB)...O(4W)#9 | 0.85       | 2.03         | 2.847(3)    | 160.4          |
| O(2W)-H(2WA)...O(1)    | 0.85       | 1.87         | 2.688(3)    | 160.5          |
| O(2W)-H(2WB)...O(4W)#8 | 0.85       | 2.05         | 2.749(4)    | 139            |
| O(3W)-H(3WA)...O(5)#7  | 0.85       | 2.27         | 3.085(4)    | 162            |
| O(3W)-H(3WB)...O(3)#6  | 0.85       | 2            | 2.844(3)    | 173.9          |
| O(4W)-H(4WA)...O(2)#1  | 0.85       | 1.88         | 2.708(3)    | 163.9          |
| O(4W)-H(4WB)...O(4)#5  | 0.85       | 2.01         | 2.759(3)    | 146.3          |

Symmetry codes: #1: -x+2, -y+1, -z+1; #2: x+1, y-1, z; #3: -x+2, -y+2, -z+1; #4: x-1, y+1, z; #5: x, -y+1/2, z+1/2; #6: x-1, y, z; #7: -x+1, y+1/2, -z+1/2; #8: x, y+1, z; #9: x, -y+1/2, z-1/2; #10: -x+2, y+1/2, -z+1/2.

**Table S8** Hydrogen bonding parameters for **4**.

| D-H...A                | d(D-H)<br>(Å) | d(H...A)<br>(Å) | d(D...A)<br>(Å) | <(D-H...<br>A) (°) |
|------------------------|---------------|-----------------|-----------------|--------------------|
| O(2W)-H(2WA)...O(1W)#3 | 0.85          | 2.05            | 2.87(2)         | 162.1              |
| O(1W)-H(1WB)...O(5)#4  | 0.85          | 2.38            | 3.107(12)       | 143.6              |
| O(1W)-H(1WB)...O(4)#4  | 0.85          | 2.27            | 3.029(10)       | 149.4              |
| O(1W)-H(1WA)...O(5)    | 0.85          | 2.39            | 2.892(15)       | 118.7              |
| N(1)-H(1C)...O(1)#1    | 0.9           | 2.5             | 3.215(9)        | 137.3              |
| C(23)-H(23)...O(5)#5   | 0.93          | 2.45            | 3.311(10)       | 154.9              |

Symmetry codes: #1 -x+2, -y, -z; #2 -x+2, y, -z+1/2; #3 x, y+1, z; #4 -x+3/2, -y+1/2, -z; #5 x+1/2, -y+1/2, z+1/2.

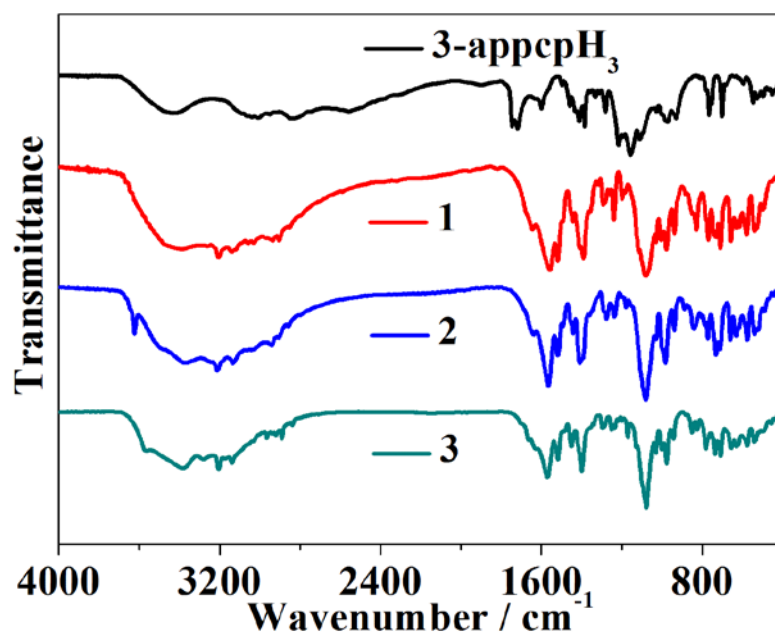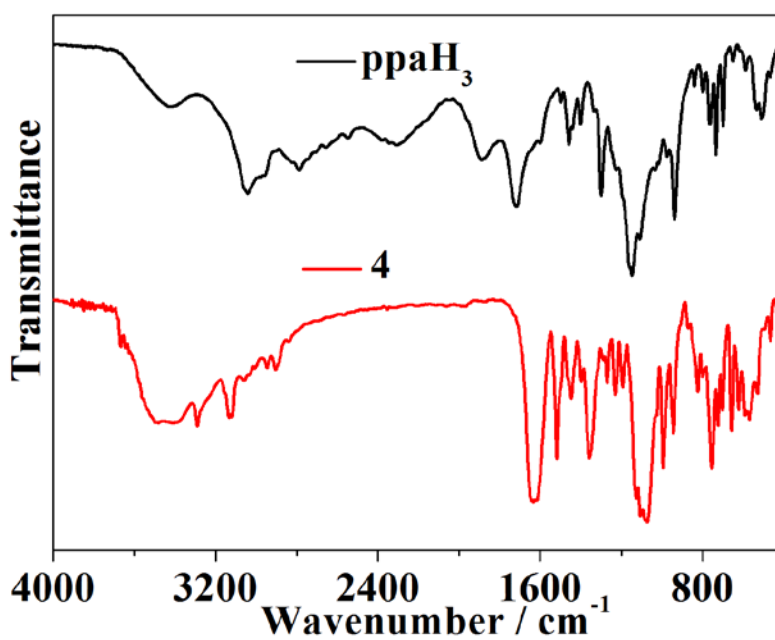

Fig. S1. The IR spectra for compounds 3-ppapH<sub>3</sub>, ppaH<sub>3</sub> and 1-4.

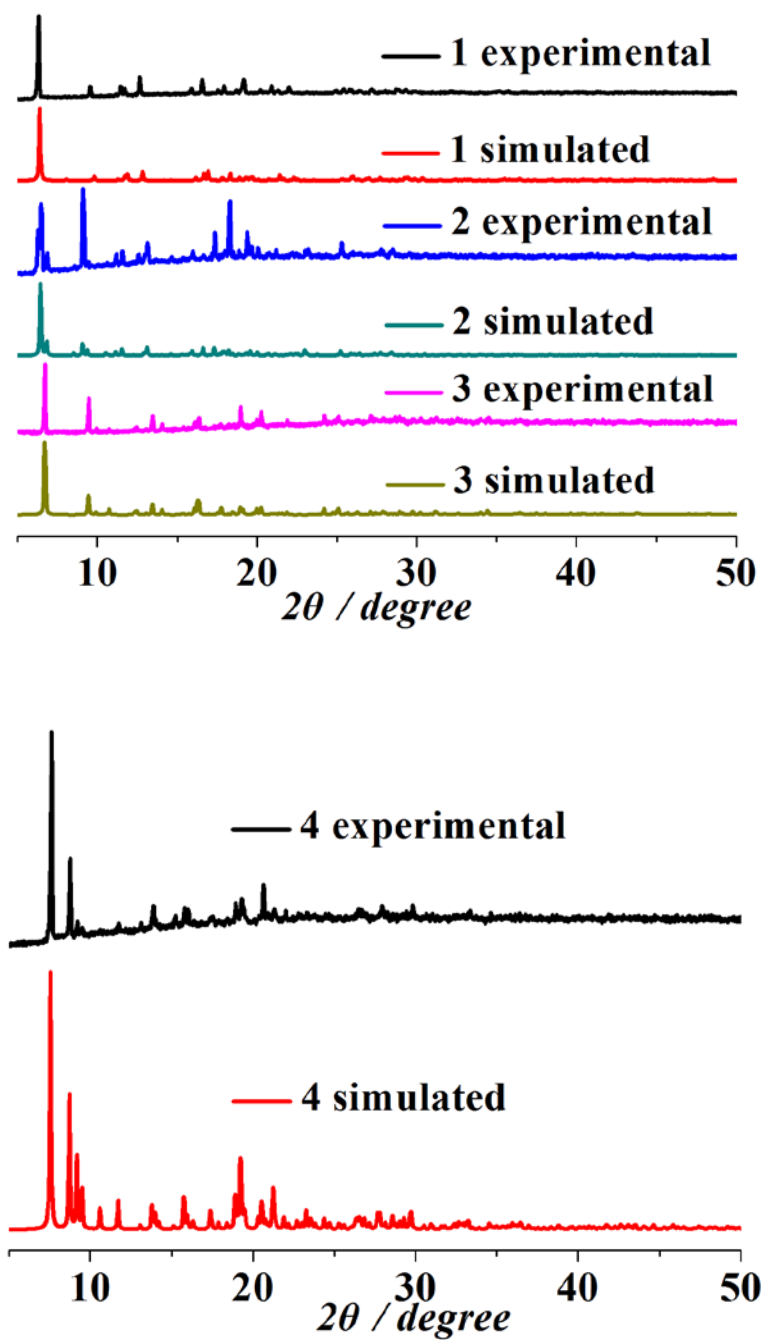

Fig. S2. XRD patterns for compounds 1-4.



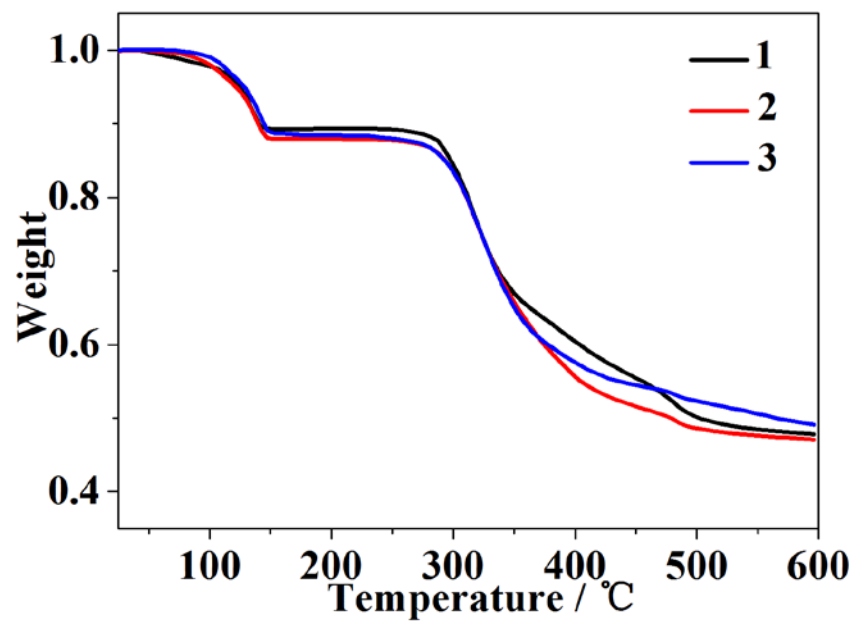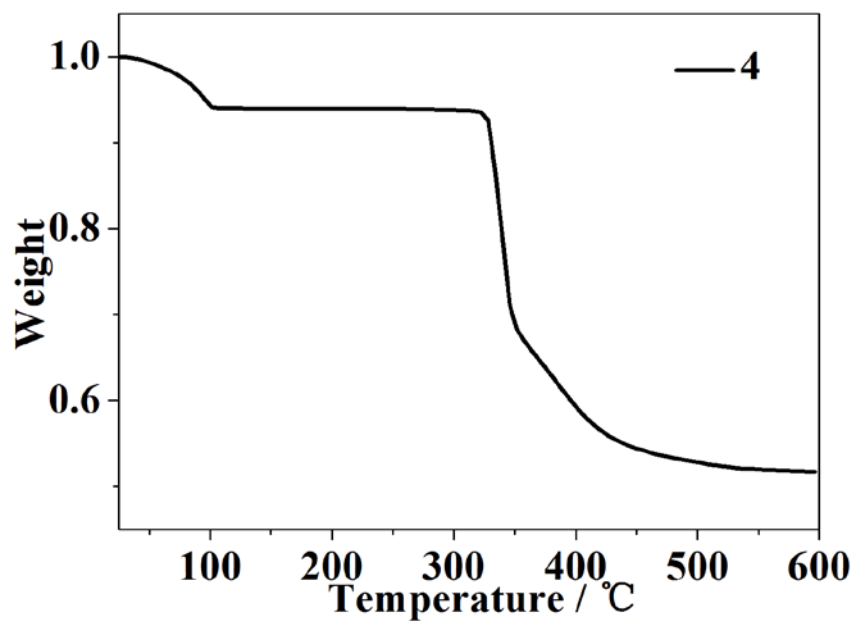

Fig. S3. TGA curves for compounds 1-4.

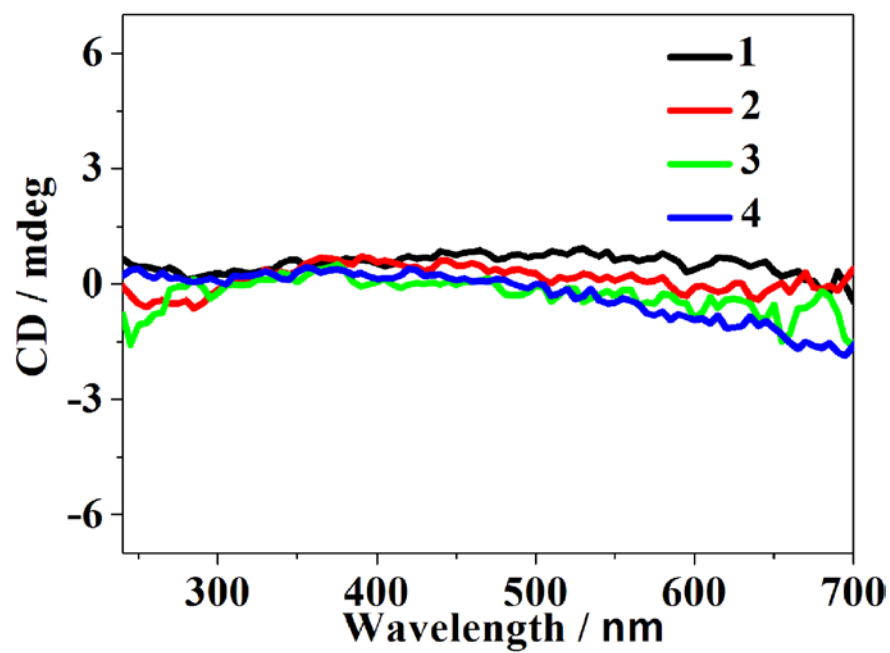

Fig. S4. CD spectra for compounds 1-4.

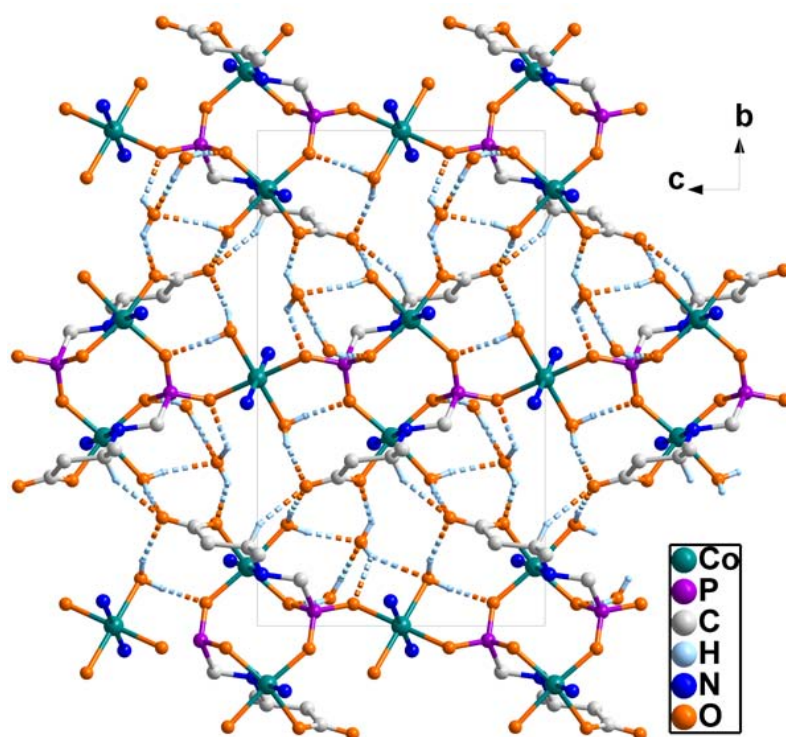

Fig. S5. The hydrogen bond network in compound 1.

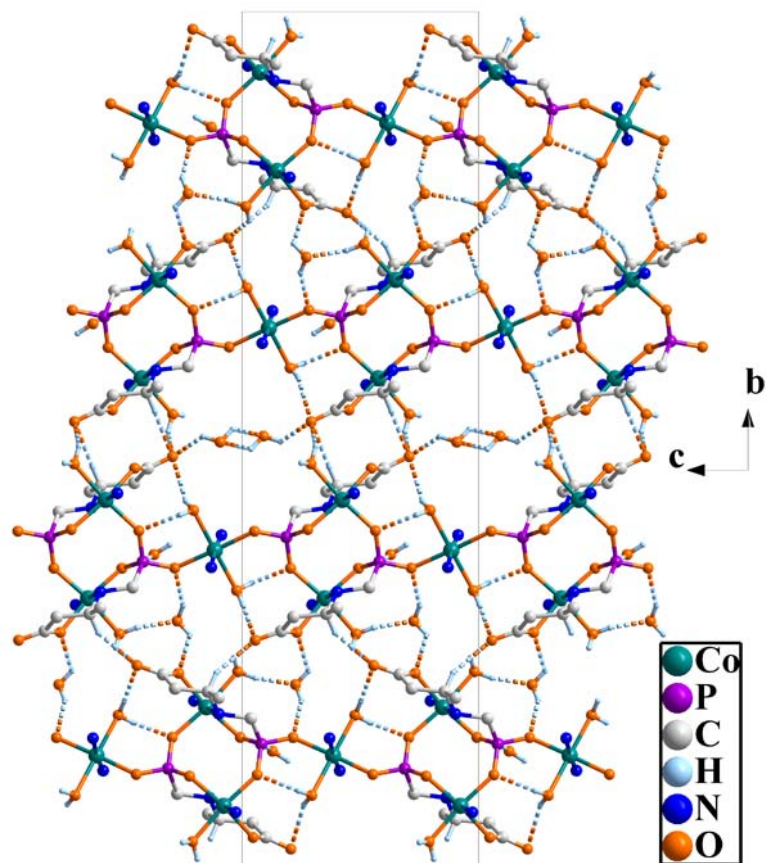

**Fig. S6.** The hydrogen bond network in compound 2.

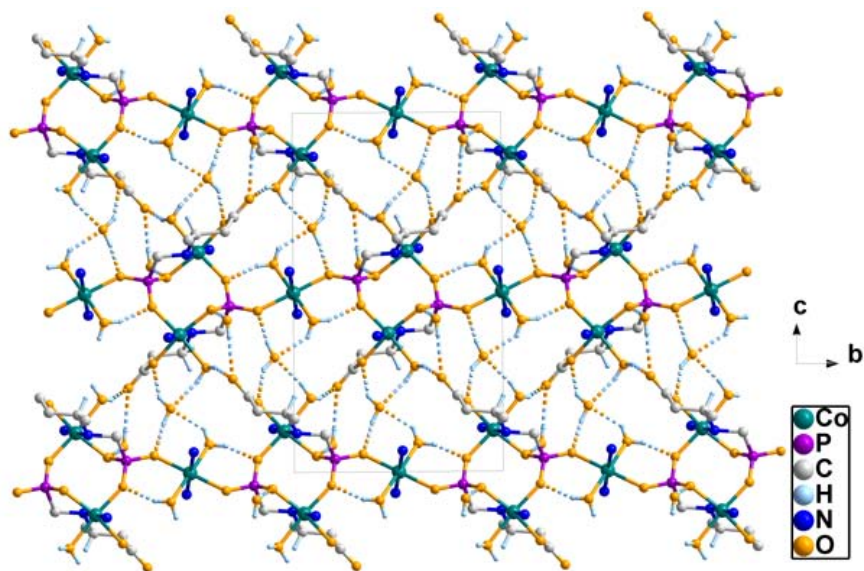

**Fig. S7.** The hydrogen bond network in compound 3.

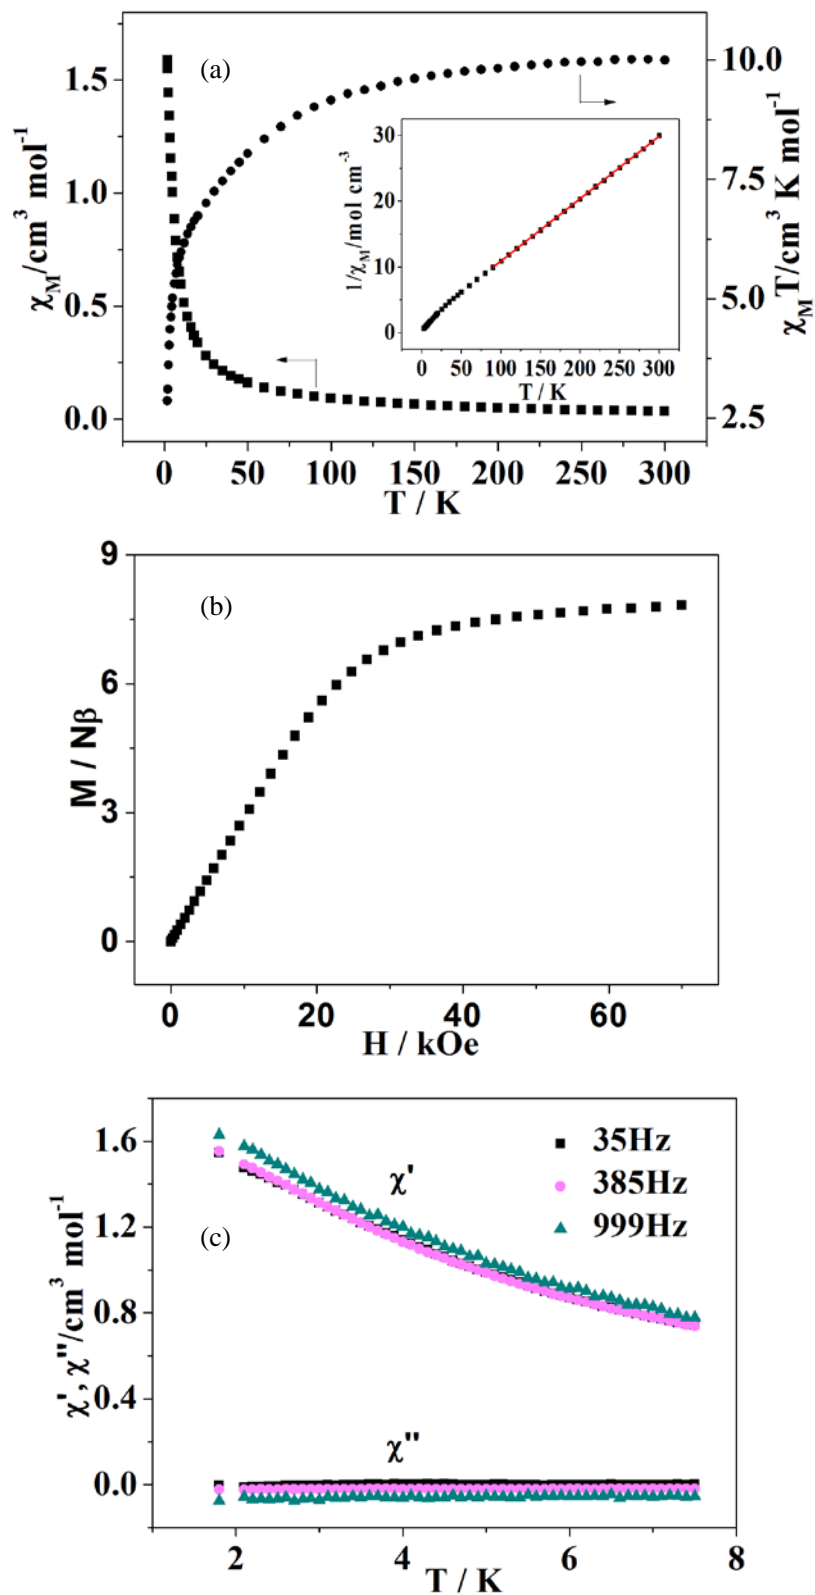

**Fig. S8** The  $\chi_M$ ,  $\chi_M T$ ,  $1/\chi_M$  vs.  $T$  (a),  $M$  vs.  $H$  at 1.8 K (b) and  $\chi'$  and  $\chi''$  vs.  $T$  (c) plots for compound **1**.

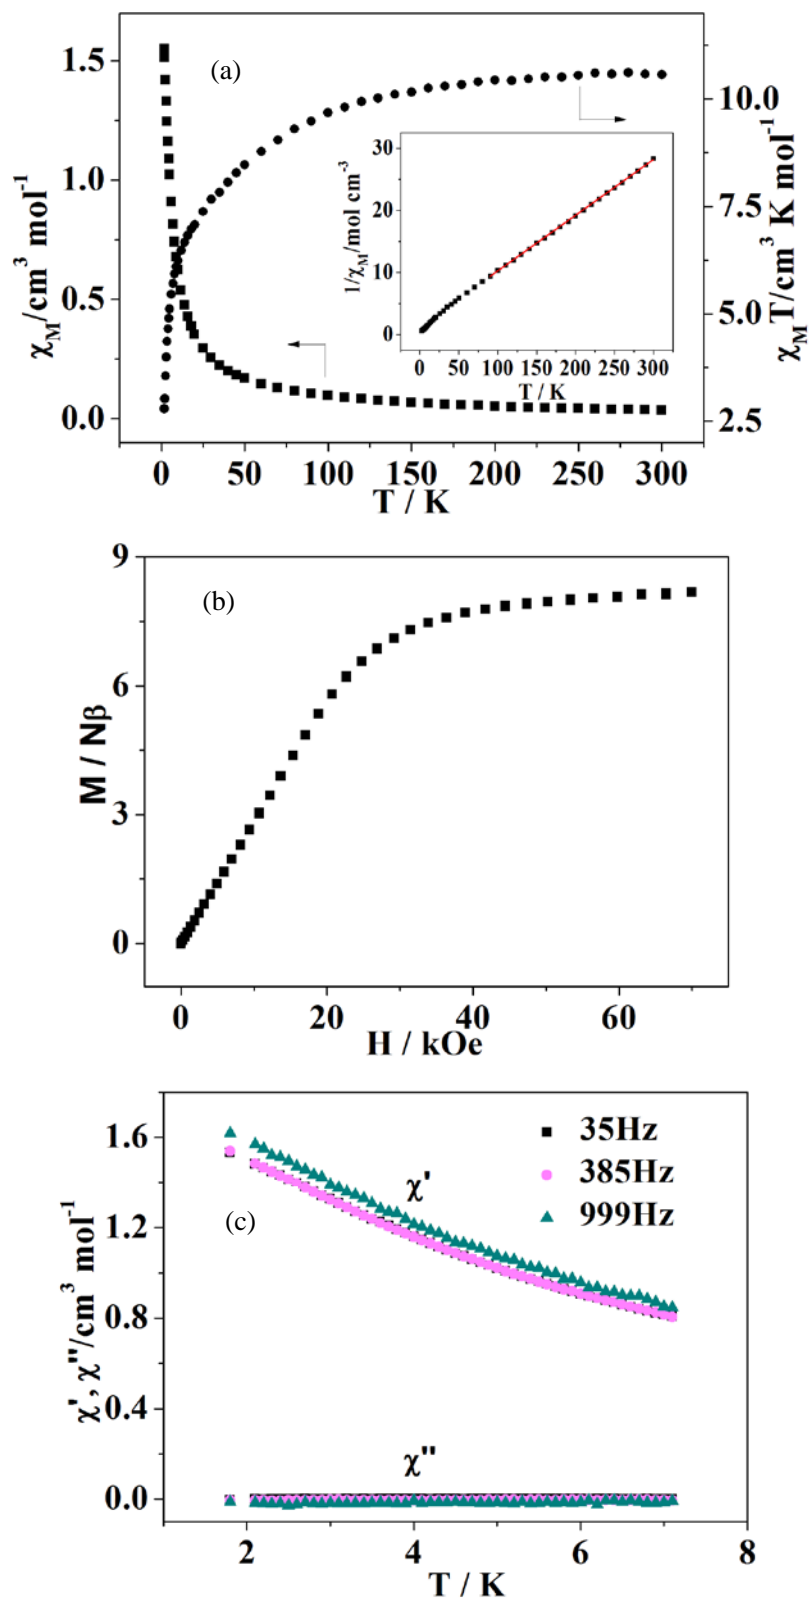

**Fig. S9** The  $\chi_M$ ,  $\chi_M T$ ,  $1/\chi_M$  vs.  $T$  (a),  $M$  vs.  $H$  at 1.8 K (b) and  $\chi'$  and  $\chi''$  vs.  $T$  (c) plots for compound 2.

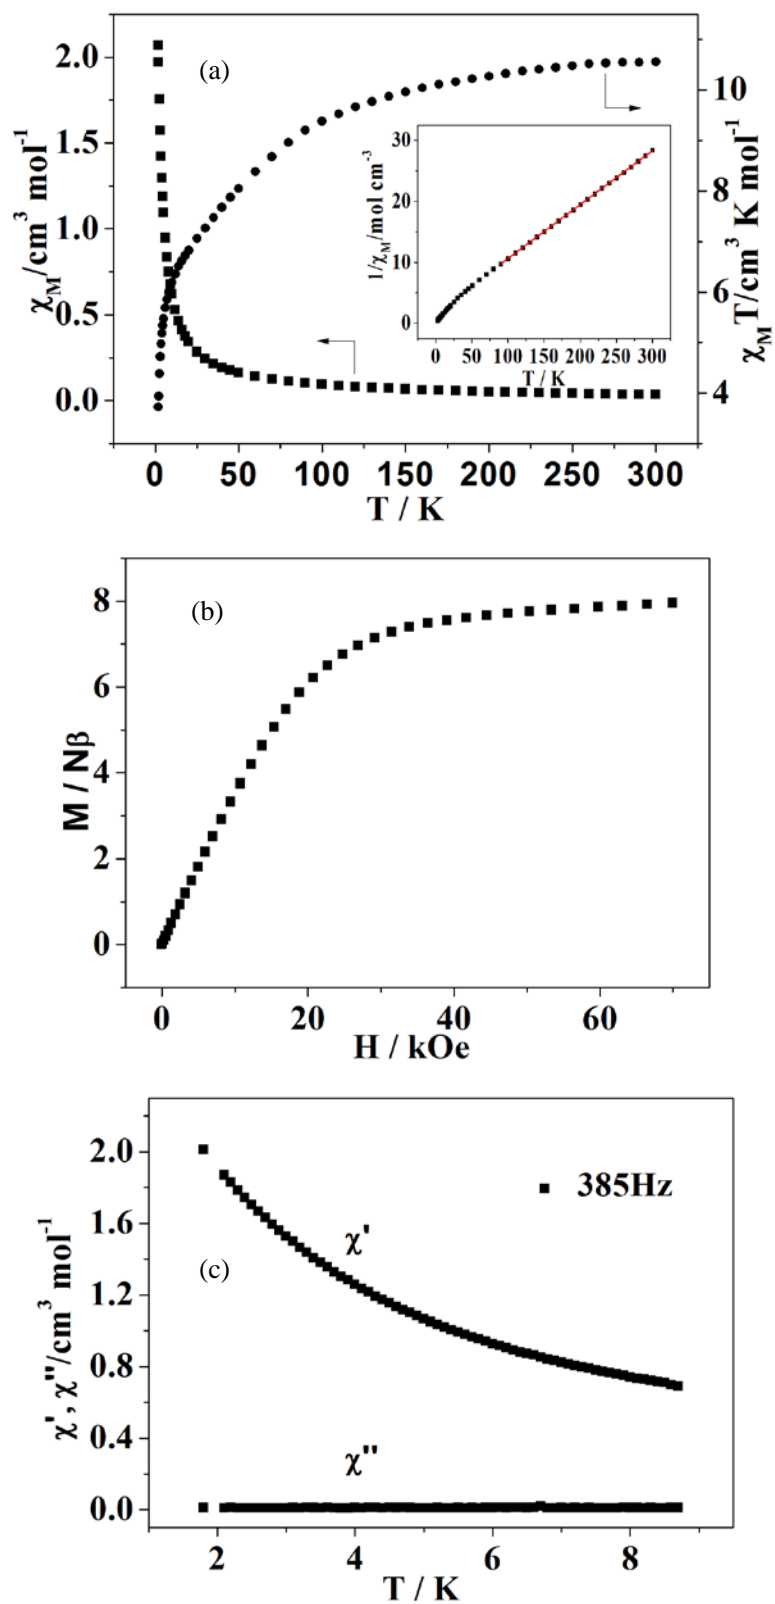

**Fig. S10** The  $\chi_M$ ,  $\chi_M T$ ,  $1/\chi_M$  vs.  $T$  (a),  $M$  vs.  $H$  at 1.8 K (b) and  $\chi'$  and  $\chi''$  vs.  $T$  (c) plots for compound **3**.

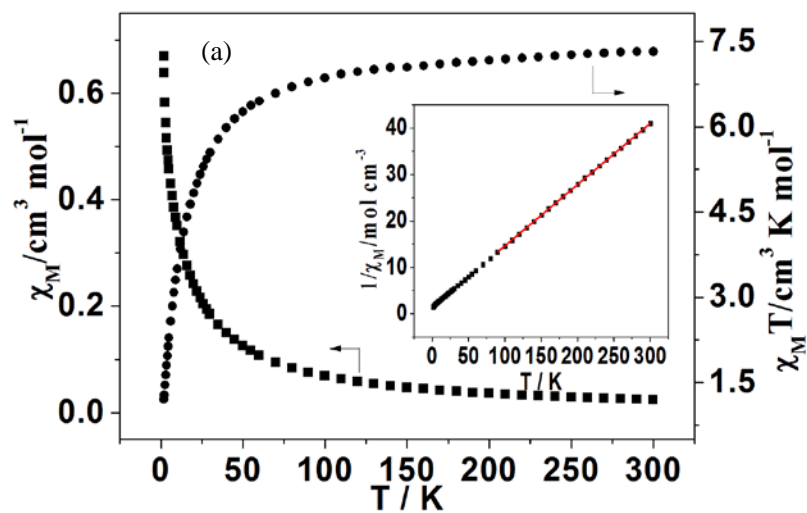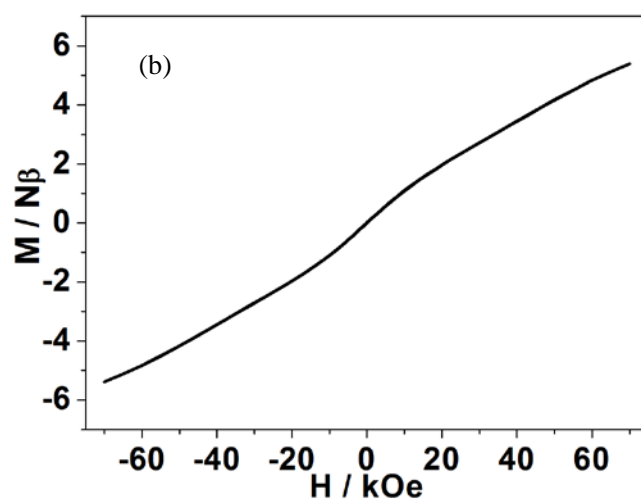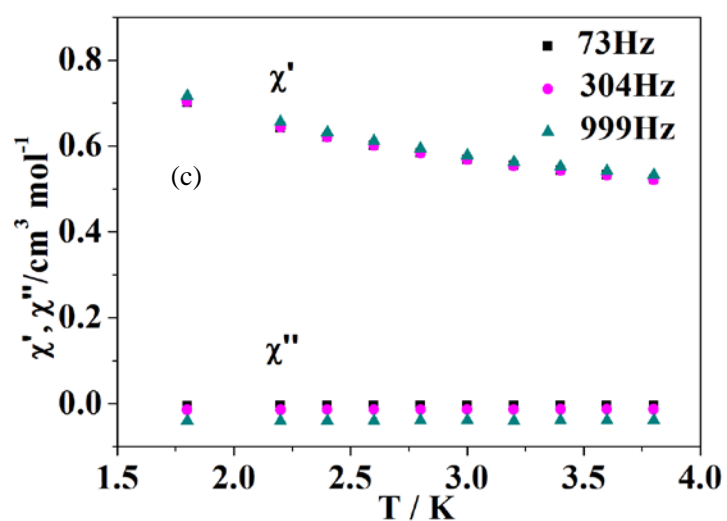

**Fig. S11** The  $\chi_M$ ,  $\chi_M T$ ,  $1/\chi_M$  vs.  $T$  (a),  $M$  vs.  $H$  at 1.8 K (b) and  $\chi'$  and  $\chi''$  vs.  $T$  (c) plots for compound **4**.
